# Supplementary material for: Observation of soft glassy behavior in a magnetic colloid exposed to an external magnetic field
Source: Royal Society of Chemistry journal article supplement (doi:10.1039/d0sm00830c), 2020-01-01
Supplement: d0sm00830c2.pdf [file d0sm00830c2.pdf]

## Observation of soft glassy dynamics in a magnetic colloid exposed to an external magnetic field

Sithara Vinod, Philip J. Camp and J.Philip

### Supplemental Material

#### Phase contrast microscope with Magnetic field control stage

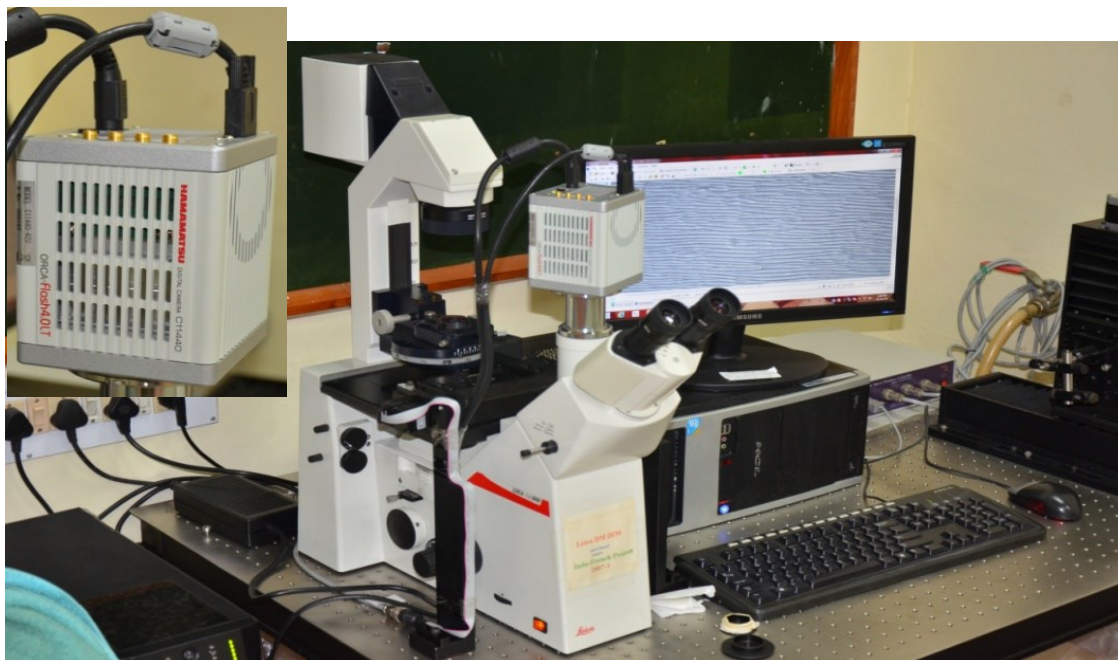

For microscopy, the source of the magnetic field was a permanent magnet sitting on two arms of a motorized stage, which was brought closer to the sample using a stepper motor. For microscopy, the source of the magnetic field was a permanent magnet sitting on two arms of a motorized stage, which was brought closer to the sample using a stepper motor.
